# Supplementary material
Source: HighWire-hosted journal article supplement (https://bmjopen.bmj.com/content/12/6/e051125)
Supplement: inline-supplementary-material-1 [file inline-supplementary-material-1.pdf]

**HEALTH FACILITY CHARACTERISTICS**

| Health facility name | Health facility Location | number of healthcare workers |                      | Number of auxiliary staff | Population of catchment area |
|----------------------|--------------------------|------------------------------|----------------------|---------------------------|------------------------------|
|                      |                          | Number of nurses             | Number of clinicians |                           |                              |
| Mpemba               | Rural                    | 7                            | 2                    | 19                        | 20,619                       |
| Dziwe                | Rural                    | 5                            | 3                    | 32                        | 18,886                       |
| Chabvala             | Rural                    | 3                            | 2                    | 25                        | 13,746                       |
| Chileka SDA          | Rural                    | 3                            | 2                    | 26                        | 17,240                       |
| Lundu                | Rural                    | 5                            | 3                    | 26                        | 27,164                       |
| Namikoko             | Rural                    | 3                            | 2                    | 19                        | 9,675                        |
| Makata               | Rural                    | 2                            | 2                    | 27                        | 36,213                       |
| Kadidi               | Rural                    | 4                            | 4                    | 21                        | 20,414                       |
| Gateway              | Urban                    | 15                           | 10                   | 43                        | No records available         |
| Mbayani              | Urban                    | 6                            | 2                    | 49                        | 74,102                       |
| Chirimba             | Urban                    | 6                            | 5                    | 45                        | 61,093                       |
| Ndirande             | Urban                    | 31                           | 11                   | 80                        | 131,353                      |
| Malabada             | Rural                    | 6                            | 3                    | 42                        | No records available         |
| Chikowa              | Rural                    | 6                            | 6                    | 36                        | 36,174                       |
| Chileka              | Rural                    | 19                           | 7                    | 62                        | 30,803                       |
| Mdeka                | Rural                    | 8                            | 3                    | 37                        | 33,406                       |
| Lirangwe             | Rural                    | 9                            | 3                    | 40                        | 28,896                       |
| Madziabango          | Rural                    | 6                            | 2                    | 33                        | 9,901                        |
| South Lunzu          | Urban                    | 21                           | 11                   | 25                        | 89,963                       |
| Pensulo              | Rural                    | 4                            | 1                    | 29                        | 16,245                       |
| Mitsidi              | Rural                    | 5                            | 2                    | 40                        | No records available         |
| Zingwangwa           | Urban                    | 21                           | 9                    | 71                        | 141,123                      |
| Limbe                | Urban                    | 21                           | 11                   | 95                        | 77,108                       |
| Ameca                | Rural                    | 6                            | 3                    | 20                        | No records available         |
| Light House          | Urban                    | 0                            | 1                    | 10                        | No records available         |
| Bangwe               | Urban                    | 21                           | 10                   | 98                        | 203,022                      |
| Makhetha             | Urban                    | 7                            | 3                    | 37                        | 62,919                       |
| Mpingo               | Rural                    | 3                            | 0                    | 16                        | 9,780                        |
| Chimembe             | Rural                    | 5                            | 2                    | 16                        | 20,088                       |
| Soche Maternity      | Rural                    | 3                            | 2                    | 33                        | 15,948                       |
| Chilomoni            | Urban                    | 21                           | 8                    | 55                        | 76,030                       |
